# Supplementary material for: Application of a simple copper(ii) complex compound as an epinephrine selective voltammetric sensor in the presence of uric acid under aqueous conditions
Source: Royal Society of Chemistry journal article supplement (doi:10.1039/d4dt02702g), 2024-11-21
Supplement: d4dt02702g1.pdf [file d4dt02702g1.pdf]

### *Electronic Supporting Information*

#### **Application of a simple copper(II) complex compound as an epinephrine selective voltammetric sensor in the presence of uric acid in aqueous conditions**

Daria Nowicka,<sup>\*a</sup> Karol Garbaczewski,<sup>a</sup> Teresa Łuczak,<sup>a</sup> Giuseppe Forte,<sup>b</sup> Giuseppe Consiglio,<sup>c</sup> Maciej Kubicki,<sup>a</sup> Violetta Patroniak<sup>a</sup> and Adam Gorczyński<sup>\*a</sup>

- a. Faculty of Chemistry, Adam Mickiewicz University in Poznań, Uniwersytetu Poznańskiego 8, 61-614 Poznań, Poland
- b. Department of Drug Science and Health University of Catania, Via S. Sofia 64, 95125
- c. Department of Chemical Science University of Catania, Via S. Sofia 64, 95125, Italy

Correspondence\* [d.nowicka@amu.edu.pl](mailto:d.nowicka@amu.edu.pl); [adam.gorczynski@amu.edu.pl](mailto:adam.gorczynski@amu.edu.pl)

#### *Table of contents for Supporting Information*

|                                                     |   |
|-----------------------------------------------------|---|
| 1. Synthesis and physical characterization.....     | 2 |
| 2. Crystallographic studies.....                    | 4 |
| 3. Characterization of the bare gold electrode..... | 5 |
| 4. Electrochemical experiments.....                 | 6 |

## 1. Synthesis and physical characterization

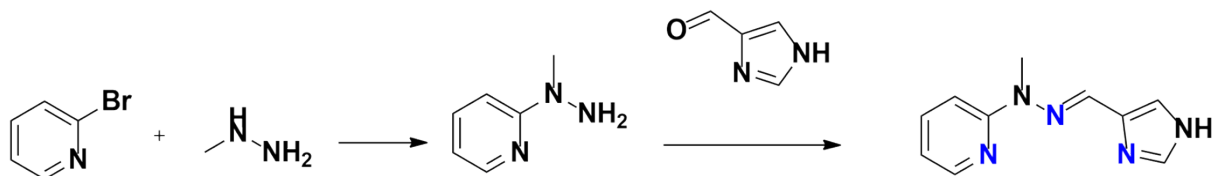

**Fig. S1.** Scheme of ligand L [ $C_{10}H_{11}N_5$ ] synthesis.

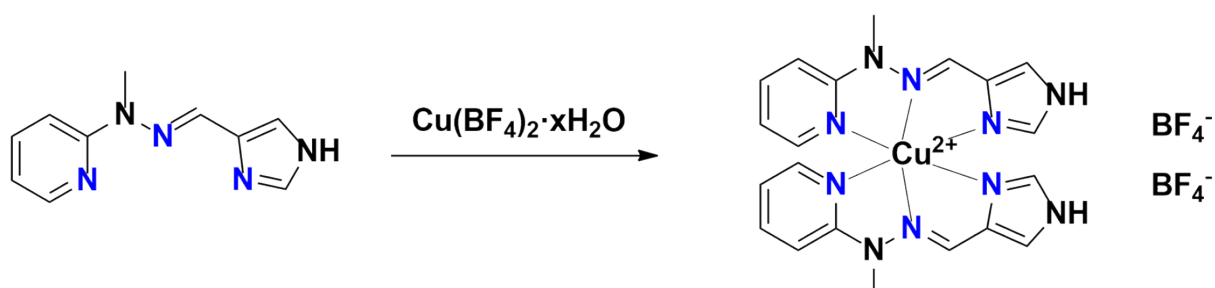

**Fig. S2.** Scheme of copper(II) complex  $[CuL_2](BF_4)_2$  synthesis.

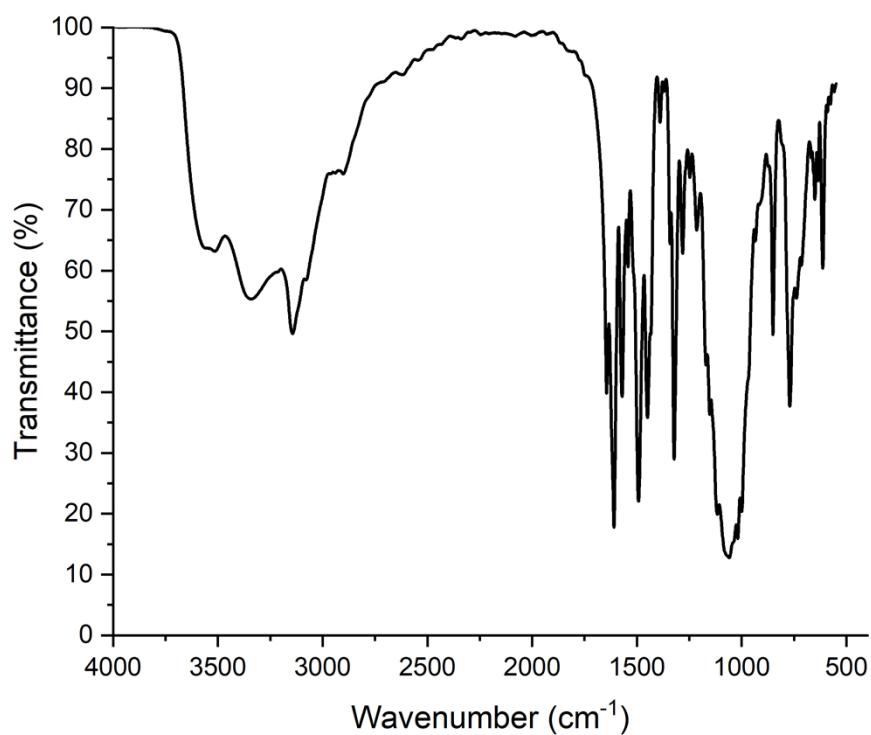

**Fig. S3.** FT-IR spectrum of copper(II) complex  $[CuL_2](BF_4)_2$ .

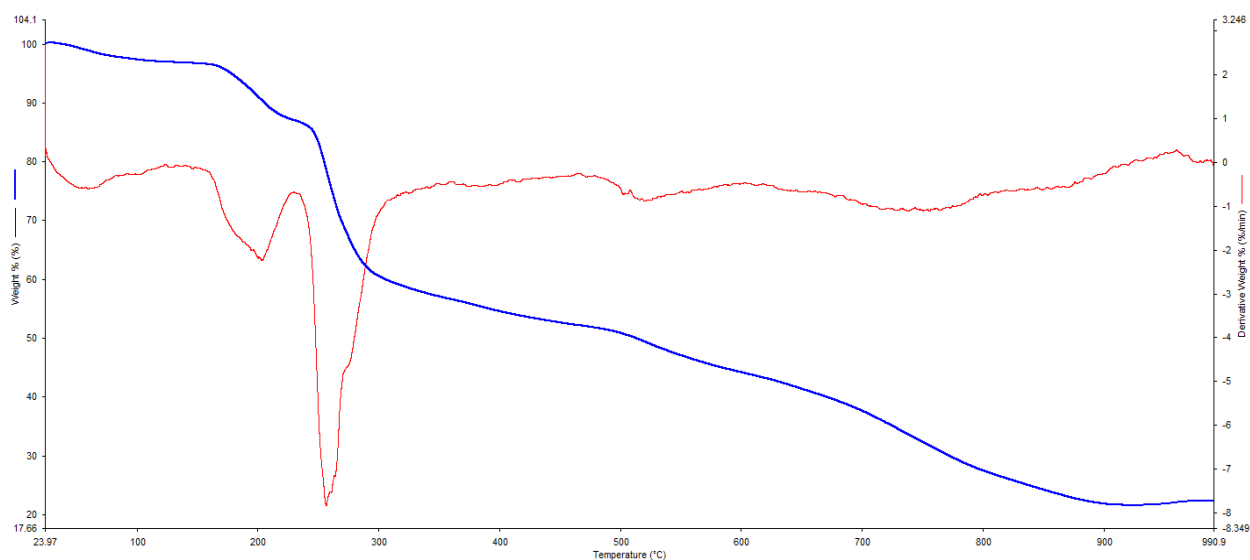

**Fig. S4.** Thermogravimetric analysis of compound **1**.

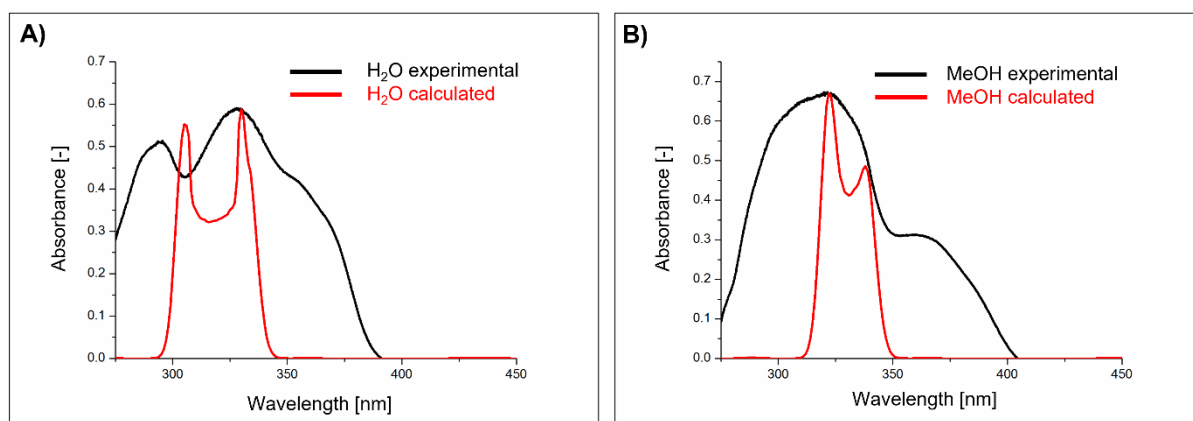

**Fig. S5.** Comparison of experimentally measured and theoretically calculated UV-Vis spectra of  $\text{CuL}_2$  in water (A) and methanol (B), at the CAM-B3LYP/6-311+G(2d,p)/CPCM level.

## 2. Crystallographic studies

**Table S1.** Crystal data, data collection and structure refinement.

| Compound                             | <b>CuL<sub>2</sub></b>                                                   |
|--------------------------------------|--------------------------------------------------------------------------|
| Formula                              | $C_{20}H_{22}CuN_{10}^{2+} \cdot 2BF_4^- \cdot CH_3OH \cdot O(C_3H_7)_2$ |
| Formula weight                       | 773.85                                                                   |
| Crystal system                       | monoclinic                                                               |
| Space group                          | P2 <sub>1</sub> /n                                                       |
| a(Å)                                 | 12.4491(4)                                                               |
| b(Å)                                 | 13.8403(3)                                                               |
| c(Å)                                 | 19.8972(6)                                                               |
| β(°)                                 | 97.153(3)                                                                |
| V(Å <sup>3</sup> )                   | 3401.59(17)                                                              |
| Z                                    | 4                                                                        |
| D <sub>x</sub> (g cm <sup>-3</sup> ) | 1.511                                                                    |
| F(000)                               | 1596                                                                     |
| μ(mm <sup>-1</sup> )                 | 0.729                                                                    |
| Reflections:                         |                                                                          |
| collected                            | 19089                                                                    |
| unique (R <sub>int</sub> )           | 6945 (0.0401)                                                            |
| with I>2σ(I)                         | 4856                                                                     |
| R(F) [I>2σ(I)]                       | 0.0692                                                                   |
| wR(F <sup>2</sup> ) [I>2σ(I)]        | 0.1582                                                                   |
| R(F) [all data]                      | 0.1054                                                                   |
| wR(F <sup>2</sup> ) [all data]       | 0.1777                                                                   |
| Goodness of fit                      | 1.042                                                                    |
| max/min Δρ (e·Å <sup>-3</sup> )      | 1.91/-0.80                                                               |
| CCDC deposition                      | 2346925                                                                  |

### 3. Characterization of the bare gold electrode

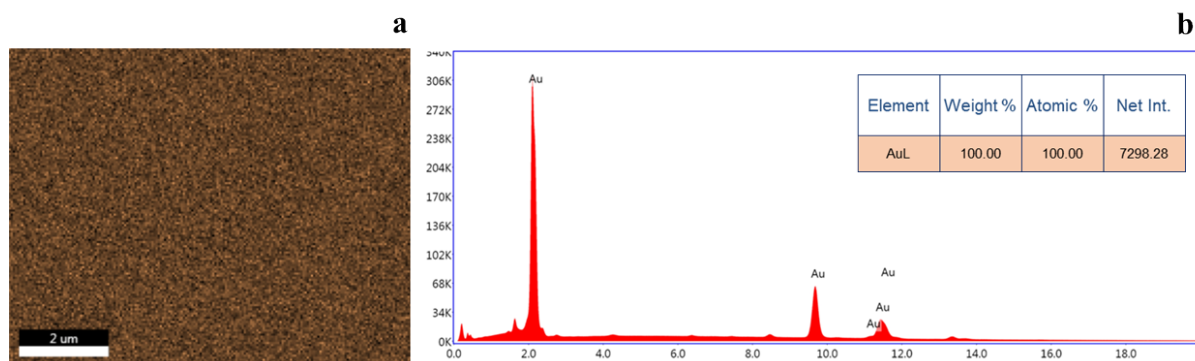

**Fig. S6.** (a) EDAX analysis of the bare Au electrode (2 μm) and its (b) X-ray energy dispersion spectrum.

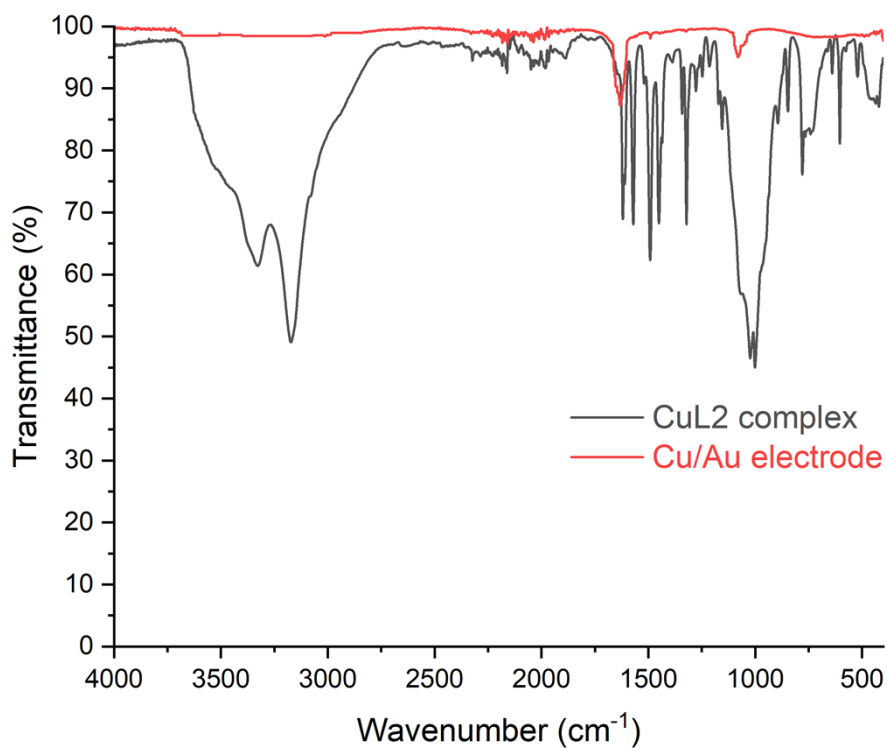

**Fig. S7.** Comparison of ATR-IR spectra of the CuL<sub>2</sub> complex and Cu/Au electrode.

#### 4. Electrochemical experiments

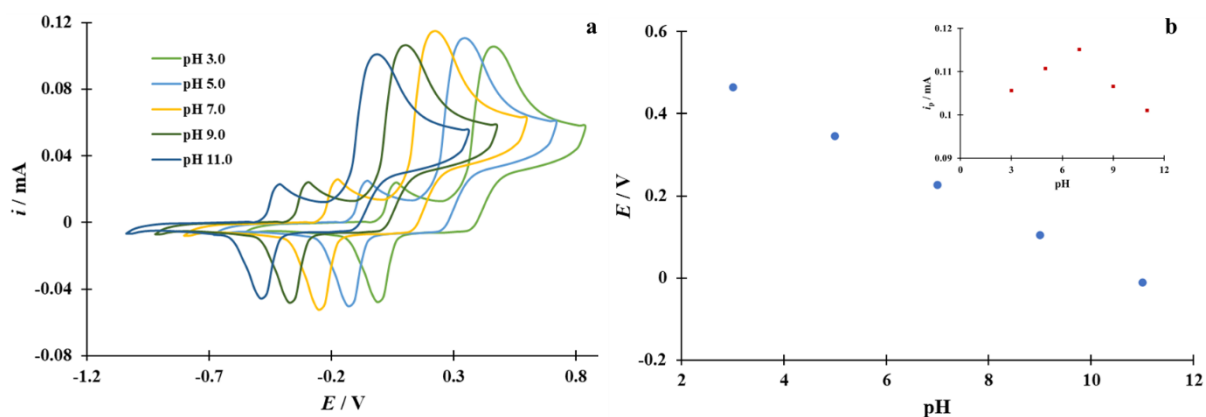

**Fig. S8.** (a) CVs of the Cu/Au electrode in supporting electrolyte solution at various pH in the range from pH 3.0 = pH 11.0 in the presence of 0.5 mM EP,  $dE/dt = 0.1 \text{ Vs}^{-1}$ . (b) Effect of pH on the peak potential during EP electrooxidation. Insert: effect of pH on the peak current.

**Table S2.** Determination of EP in the presence of UA ( $n = 3$ ) at the Cu/Au electrode.

| Initial amount [mM] |      | Spiked amount [mM] |     | Found amount [mM] |      | Recovery [%] |       | RSD [%] |     |
|---------------------|------|--------------------|-----|-------------------|------|--------------|-------|---------|-----|
| EP                  | UA   | EP                 | UA  | EP                | UA   | EP           | UA    | EP      | UA  |
| 0.100               | 0.50 | 0                  | 0   | 0.102             | 0.49 | 102.0        | 98.0  | 2.0     | 1.8 |
| 0.100               | 0.50 | 0.01               | 0   | 0.111             | 0.51 | 100.9        | 102.0 | 1.9     | 1.9 |
| 0.100               | 0.50 | 0.03               | 0   | 0.133             | 0.48 | 99.3         | 96.0  | 2.6     | 1.8 |
| 0.100               | 0.50 | 0.05               | 0   | 0.148             | 0.51 | 98.7         | 102.0 | 1.6     | 2.2 |
| 0.50                | 0.50 | 0                  | 0.1 | 0.52              | 0.59 | 104.0        | 98.3  | 2.2     | 1.7 |
| 0.50                | 0.50 | 0                  | 0.3 | 0.48              | 0.84 | 96.0         | 105.0 | 1.6     | 1.5 |
| 0.50                | 0.50 | 0                  | 0.6 | 0.49              | 1.14 | 98.0         | 103.6 | 1.8     | 1.7 |
| 0.50                | 0.50 | 0                  | 1.0 | 0.51              | 1.52 | 102.0        | 101.3 | 2.1     | 1.8 |

**Table S3.** Sensing of 0.5 mM EP with addition of 5 mM of some interferents (n = 3) at the Cu/Au electrode.

| Type of interference                        | Found EP [mM] | Recovery [%] | RSD [%] |
|---------------------------------------------|---------------|--------------|---------|
| Na <sup>+</sup>                             | 0.489         | 97.8         | 2.4     |
| K <sup>+</sup>                              | 0.512         | 102.4        | 3.5     |
| Ca <sup>2+</sup>                            | 0.491         | 98.2         | 2.1     |
| NH <sub>4</sub> <sup>+</sup>                | 0.533         | 106.6        | 1.8     |
| Mg <sup>2+</sup>                            | 0.529         | 105.8        | 2.7     |
| SO <sub>4</sub> <sup>2-</sup>               | 0.479         | 95.8         | 3.2     |
| C <sub>2</sub> O <sub>4</sub> <sup>2-</sup> | 0.518         | 103.6        | 2.1     |

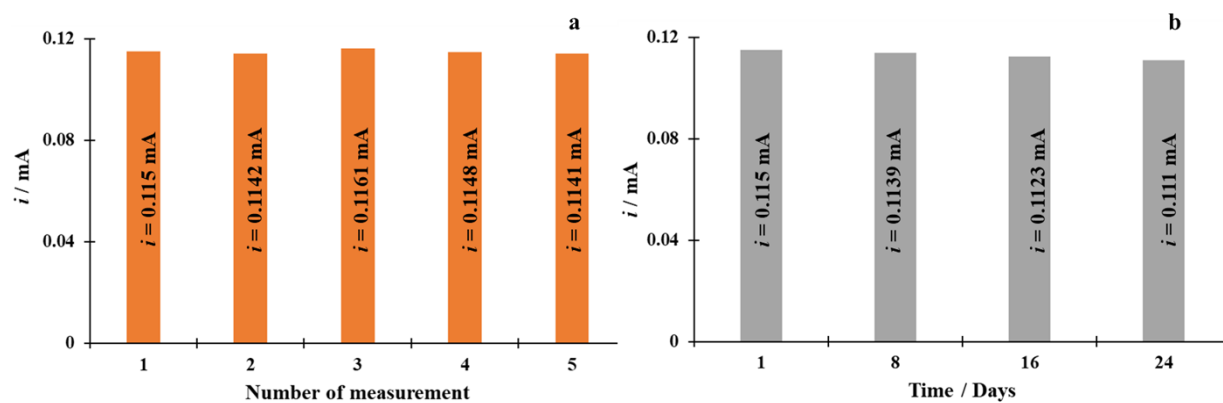

**Fig. S9.** Graphs presenting (a) reproducibility and (b) long-term stability of the Cu/Au electrode.
